# Supplementary material for: Rapid growth of fully-inorganic flexible CaxCoO2 thin films from a ligand free aqueous precursor ink for thermoelectric applications
Source: Royal Society of Chemistry journal article supplement (doi:10.1039/c9cc03441b), 2019-01-01
Supplement: c9cc03441b1.pdf [file c9cc03441b1.pdf]

## Supplementary Information

### Rapid growth of fully-inorganic flexible $\text{Ca}_x\text{CoO}_2$ thin films from ligand free aqueous precursor ink for thermoelectric applications

Tridib Kumar Sinha,<sup>a, b</sup> Jinho Lee,<sup>c</sup> Jin Kuk Kim<sup>b</sup>, Samit K. Ray<sup>a</sup>, Biplab Paul<sup>\*d</sup>

<sup>a</sup>Department of Physics, Indian Institute of Technology, Kharagpur 721302, India

<sup>b</sup>Department of Materials Engineering and Convergence Technology & <sup>c</sup>The Research Institute of Natural Science and Department of Physics Education, Gyeongsang National University, Jinju 52828, South Korea

<sup>d</sup>Thin Film Physics Division, Department of Physics, Chemistry, and Biology (IFM), Linköping University, SE-581 83 Linköping, Sweden  
E-mail: [biplab.paul@liu.se](mailto:biplab.paul@liu.se)

#### Formulation of DMF-complexes with $\text{Ca}^{2+}$ and $\text{Co}^{2+}$

The hydrated acetate salts of  $\text{Ca}^{2+}$  ( $\text{Ca}(\text{CH}_3\text{COO})_2 \cdot \text{H}_2\text{O}$ ) and  $\text{Co}^{2+}$  ( $\text{Co}(\text{CH}_3\text{COO})_2 \cdot \text{H}_2\text{O}$ ) were taken as the precursor materials which were easily soluble in DMF. The DMF complexes of the metal ions namely,  $\text{Ca}^{2+}$ -DMF and  $\text{Co}^{2+}$ -DMF were prepared simply by adding the salts separately in a molar ratio 3:4 into the excess DMF, followed by stirring for 30 min at  $60^\circ\text{C}$ . After cooling at room temperature white precipitate of  $\text{Ca}^{2+}$ -DMF and violet precipitate of  $\text{Co}^{2+}$ -DMF appeared (as shown in Figure 1 (a)), which were re-precipitated (for 4-times) from hot DMF. Here, the precursor salts and DMF were procured from Sigma Aldrich.

#### Formulation of precursor thermoelectric ink

The precipitates were mixed together by dissolving in excess of DMF followed by stirring for 1 hour at  $90^\circ\text{C}$ . After cooling at room temperature, a purple color precipitate was obtained (as shown in Figure 1) which was re-precipitated from hot DMF (for 4-times) to remove the unwanted impurities. After washing with ether, the precipitate was dried at  $60^\circ\text{C}$  to obtain a pink brown color precursor solid (as shown in extreme left of Figure 1(b)), which was easily soluble in de-ionized (DI) water to obtain a stable homogenous solution of bluish precursor ink having solid content of 10mg/mL.

#### Fabrication of thermoelectric samples

For the investigation thin films of  $\text{Ca}_{0.35}\text{CoO}_2$  were grown by CSD method on sapphire and mica substrates. The ink was simply drop-casted onto the top-surfaces of cleaned substrates and heated to  $700^\circ\text{C}$  for 10 min in ambient condition. Subsequently, black-colored thin film of  $\text{Ca}_{0.35}\text{CoO}_2$  appeared on the substrates. The plausible reaction mechanism is shown in Scheme S1.

#### Characterization

The crystal structure and morphology of the films were characterized by  $\theta$ - $2\theta$  XRD analyses using monochromatic  $\text{Cu K}\alpha$  radiation ( $\lambda = 1.5406 \text{ \AA}$ ) and scanning electron microscopy (SEM, LEO 1550 Gemini). The  $\theta$ - $2\theta$  XRD scans were performed with a Philips PW 1820 diffractometer. Compositional analyses of the films were performed by energy dispersive X-ray spectroscopy (EDS) with an accuracy of  $\pm 5\%$ . In-plane electrical resistivity and Seebeck coefficient were simultaneously measured as a function of temperature using an ULVAC-RIKO ZEM3 system.

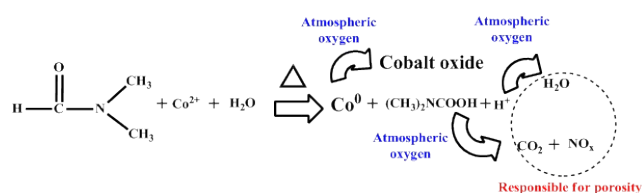

**Scheme S1.** Reduction of  $\text{Co}^{2+}$  by DMF and formation of nanoporous  $\text{Ca}_{0.35}\text{CoO}_2$  thin films.
